# Supplementary material for: Alterations of gut microbiota and metabolome are associated with primary nephrotic syndrome in children
Source: PubMed Central journal article supplement — BMC Microbiol. 2024 Dec 5;24:519. doi: 10.1186/s12866-024-03667-w (PMC11619441; doi:10.1186/s12866-024-03667-w), 2024-12-05
Supplement: 12866_2024_3667_MOESM1_ESM.pdf [file 12866_2024_3667_MOESM1_ESM.pdf]

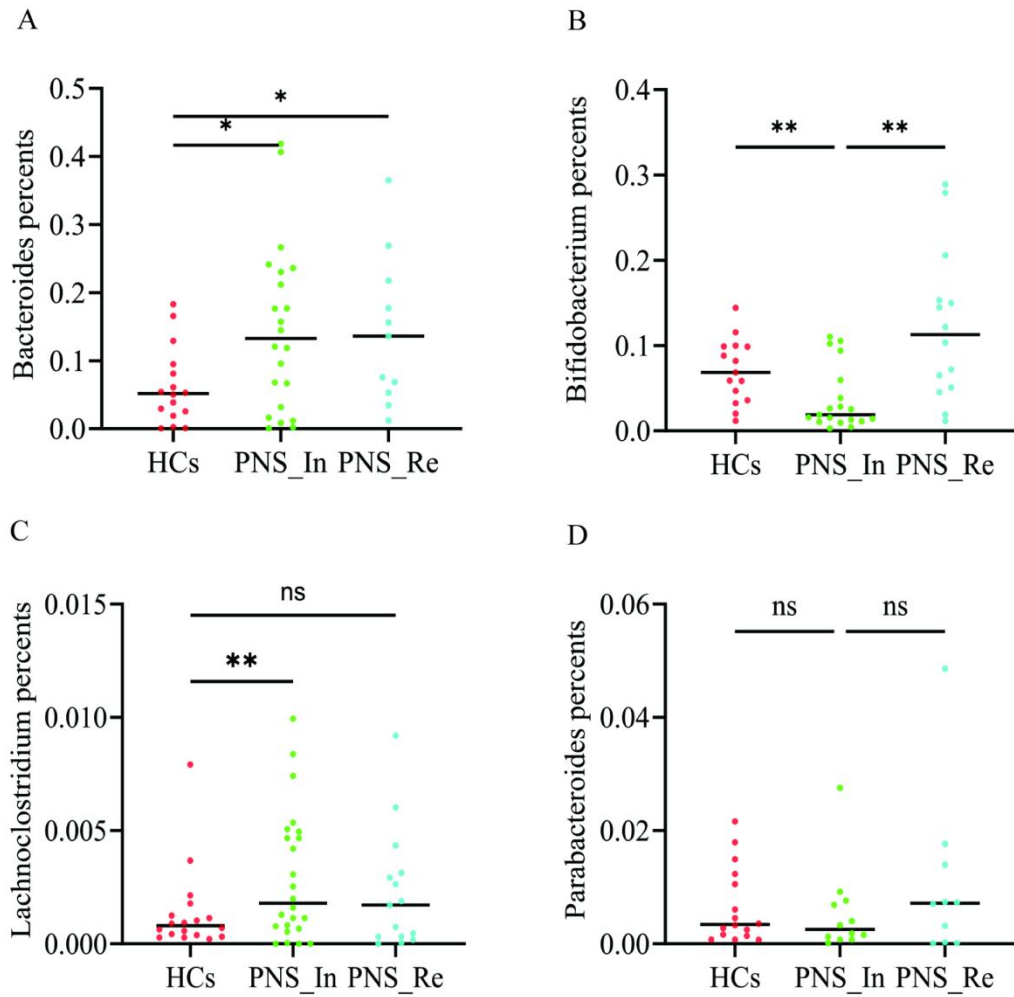

Supplementary Fig 1 Comparison of the partial intestinal bacterial structure among the HCs, PNS\_In and PNS\_Re groups. (A) *Bacteroides*, (B) *Bifidobacterium*, (C) *Lachnospiridium*, (D) *Parabacteroides*.
